# Supplementary material for: Comparing the Effects of the mTOR Inhibitors Azithromycin and Rapamycin on In Vitro Expanded Regulatory T Cells
Source: PubMed Central journal article supplement — Cell Transplant. 2019 Sep 12;28(12):1603–13. doi: 10.1177/0963689719872488 (PMC6923545; doi:10.1177/0963689719872488), 2019-09-12

## Supplemental Figures

### Flowcytometry Gating 1

The figure presents the flowcytometric gating strategies that was used for the purification of effector T cells, naive Tregs and memory Tregs. It also shows the expression of CD4, CD45RA and FoxP3 in the sorted populations.

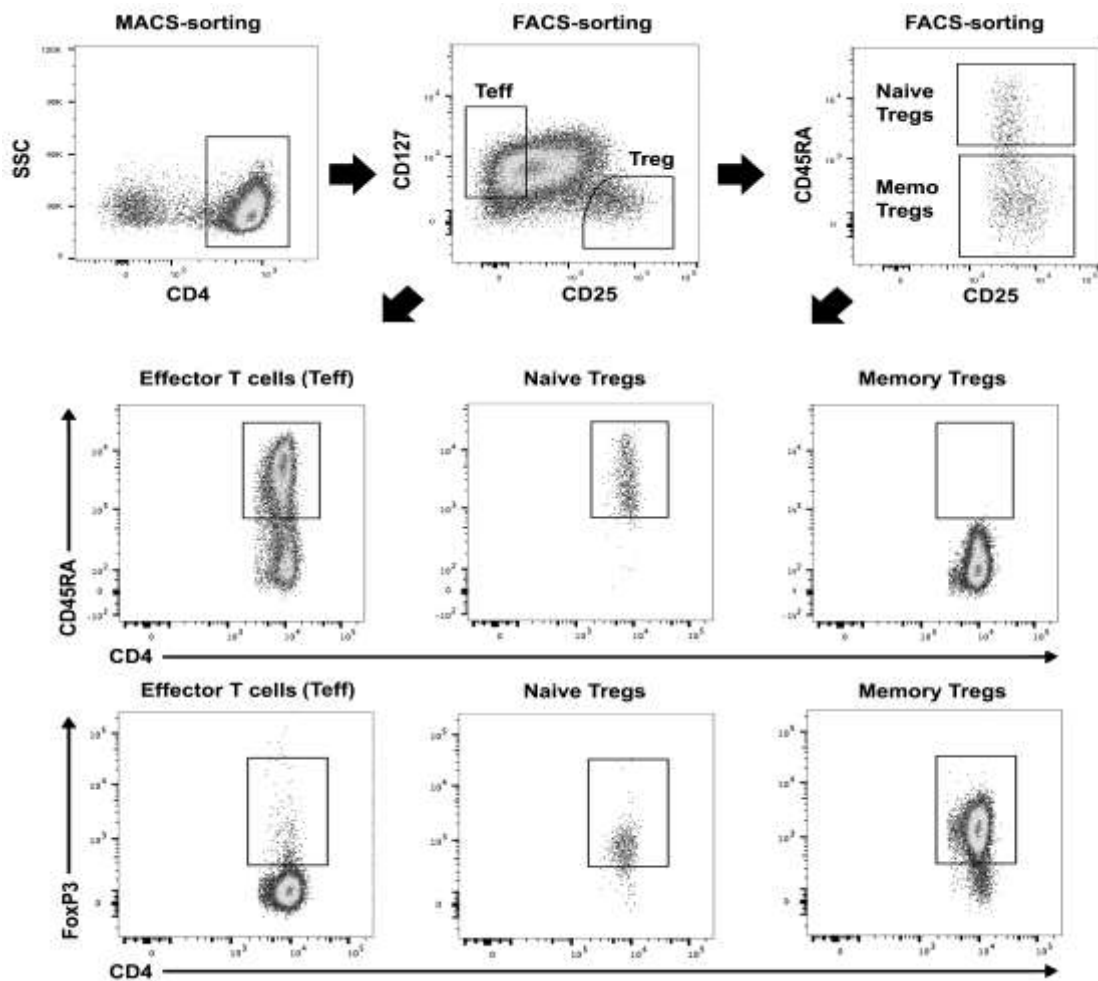

## Flowcytometry Gating 2

The figure presents the flowcytometric gating strategies that was used for analysing CD4+FoxP3+ cells and their expression of Helios, CD62L and IL-1RI.

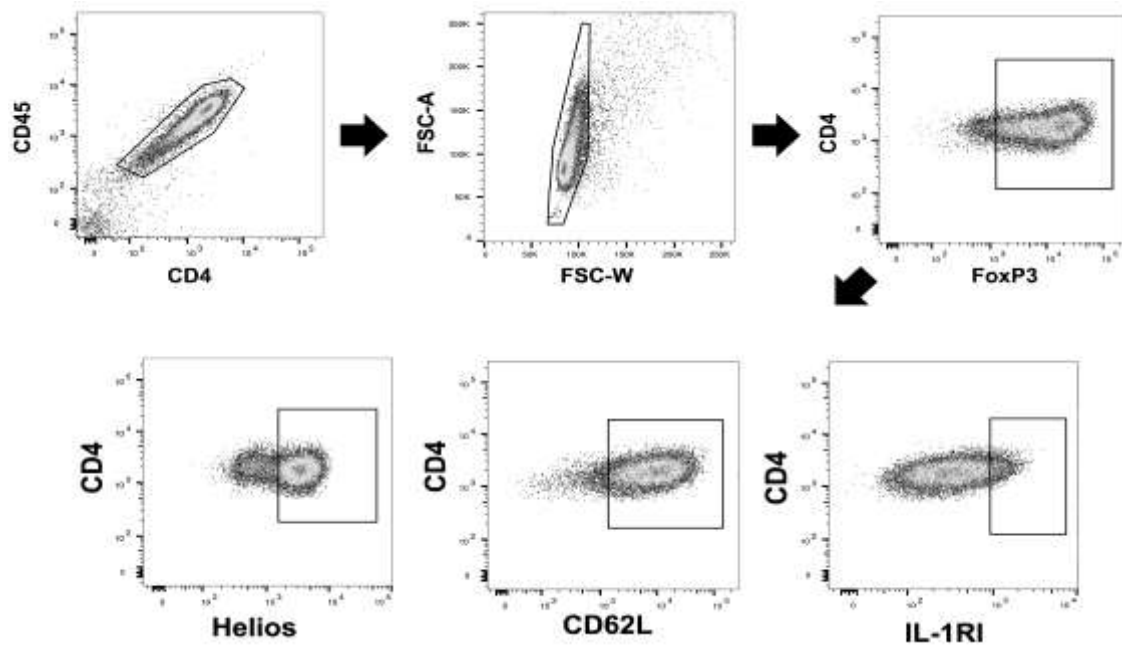

Supplement: Supplemental_material.pdf [file Supplemental_material.pdf]
